# Supplementary material for: Cocrystal formation by anti-solvent slurry
Source: Royal Society of Chemistry journal article supplement (doi:10.1039/d3ce00486d), 2023-01-01
Supplement: d3ce00486d1.pdf [file d3ce00486d1.pdf]

Supplementary data for

## **Cocrystal formation by anti-solvent slurry**

**Yi Li, Shun-Yu Li, Xia-Lin Dai, Tong-Bu Lu, Jia-Mei Chen**

## Experimental section

### Materials and general methods

CBZ was purchased from Shanghai Shengde Pharmaceutical Technology Co., Ltd. Malonic acid, succinic acid, glutaric acid, adipic acid, DL-malic acid, benzoic acid, cinnamic acid, salicylic acid, acetylsalicylic acid, vanillic acid, 2, 6-pyridinedicarboxylic acid, benzamide, isonicotinamide, nicotinamide, saccharin and 4, 4'-bipyridine were purchased from Aladdin Reagent Inc. L(+)-tartaric acid, L-malic acid, 1-hydroxy-2-naphthoic acid, 4-hydroxybenzoic acid, 2, 4-dihydroxybenzoic acid, 2, 5-dihydroxybenzoic acid, 2, 6-dihydroxybenzoic acid, 4-hydroxybenzamide and naringenin were purchased from Energy Chemical. All other chemicals and solvents were commercially available and used as received. Powder X-ray Diffraction (PXRD) analysis was performed on a Rigaku MiniFlex 600 X-ray diffractometer equipped with a D/teX Ultra one-dimensional detector, using Cu K $\alpha$  radiation ( $\lambda = 1.541862 \text{ \AA}$ ) generated at 40 kV and 15 mA. Each sample was placed on a silicon disk and measured over an angular range of 3–40 ° ( $2\theta$ ) with a step size of 0.0142° ( $2\theta$ ) and a dwell time of 0.1 s. Thermogravimetric (TG) analysis was performed using a Netzsch TG 209F3 instrument under nitrogen atmosphere. Each sample was placed on an alumina crucible and heated from 40 °C to 500 °C at a heating rate of 10 °C/min. Differential scanning calorimetry (DSC) was recorded on a Netzsch DSC 200 F3 instrument with nitrogen atmosphere. Each sample was placed on an aluminum sample pan and heated from 40 °C to the decomposition temperature of the sample at a heating rate of 10 °C/min. <sup>1</sup>H nuclear magnetic resonance (<sup>1</sup>H NMR) spectra were acquired on a Bruker 400 MHz spectrometer using dimethyl sulfoxide-d<sub>6</sub> as solvent and TMS (0 ppm) as internal standard.

### General procedure of each anti-solvent slurry experiment

A stoichiometric ratio mixture of CBZ and co-former (with the total mass of 20 mg) was added to 1 mL anti-solvent (*n*-heptane) with addition of 10-100  $\mu\text{L}$  (MeOH/MeCN/EtOAc/ACE). The resulting suspension was stirred under 600 rpm for 24-48 hours and was then filtered. The obtained solid was dried under air and was examined by PXRD.

### Anti-solvent slurry experiment 1: CBZ-malonic acid cocrystal (2:1)

A stoichiometric mixture of CBZ (16.4 mg, 0.070 mmol) and malonic acid (3.6 mg, 0.035 mmol) was added to 1 mL heptane with addition of 10  $\mu$ L MeOH/10  $\mu$ L MeCN/10  $\mu$ L EtOAc/10  $\mu$ L ACE and left to stir for 24 hours at room temperature. A stoichiometric mixture of CBZ (0.82 mg, 0.0035 mmol) and malonic acid (0.18 mg, 0.0017 mmol) was added to 0.5 mL heptane with addition of 1  $\mu$ L MeOH and left to stir for 30 min at room temperature. A stoichiometric mixture of CBZ (82.0 g, 0.35 mol) and malonic acid (18.0 g, 0.17 mol) was added to 500 mL heptane with addition of 50  $\mu$ L MeOH and left to stir for 30 min at room temperature.

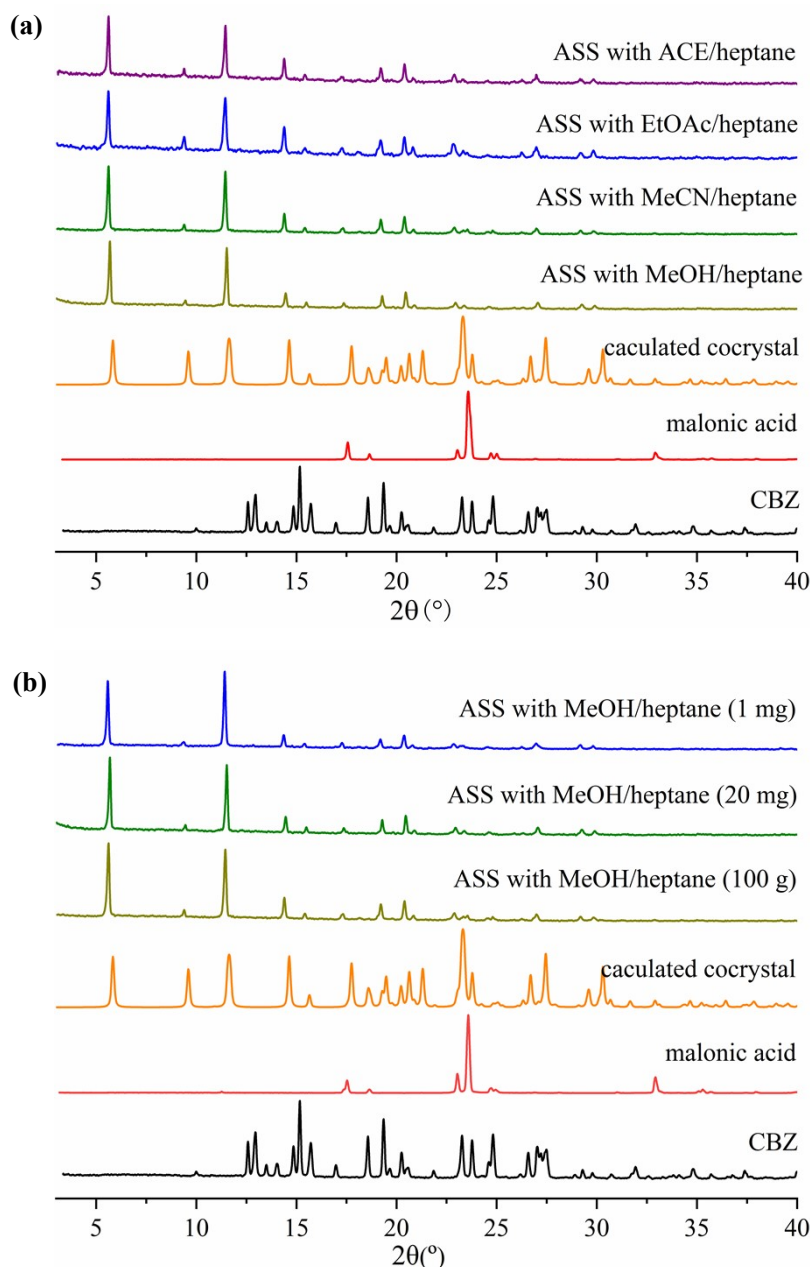

**Fig. S1** PXRD patterns of the outcome of anti-solvent slurry (ASS) experiments (a) with different solvents and (b) on varying scales of CBZ/malonic acid system.

### Anti-solvent slurry experiment 2: CBZ-succinic acid cocrystal (2:1)

A stoichiometric mixture of CBZ (16.0 mg, 0.068 mmol) and succinic acid (4.0 mg, 0.034 mmol) was added to 1 mL heptane with addition of 10  $\mu$ L MeOH/10  $\mu$ L MeCN/10  $\mu$ L EtOAc/10  $\mu$ L ACE and left to stir for 24 hours at room temperature.

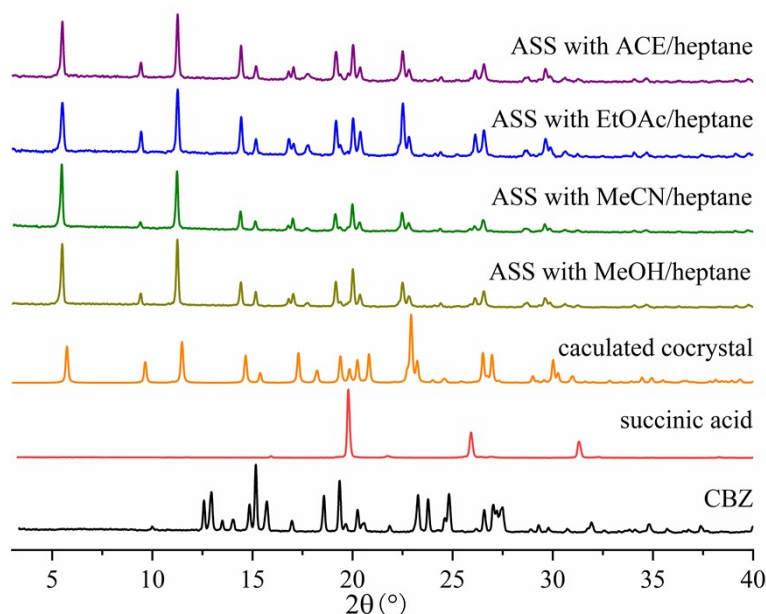

**Fig. S2** PXR D patterns of the outcome of anti-solvent slurry (ASS) experiments of CBZ/succinic acid system.

### Anti-solvent slurry experiment 3: CBZ-glutaric acid cocrystal (1:1)

An equimolar mixture of CBZ (12.8 mg, 0.055 mmol) and glutaric acid (7.2 mg, 0.055 mmol) was added to 1 mL heptane with addition of 10  $\mu$ L MeOH/10  $\mu$ L MeCN/10  $\mu$ L EtOAc/10  $\mu$ L ACE and left to stir for 24 hours at room temperature.

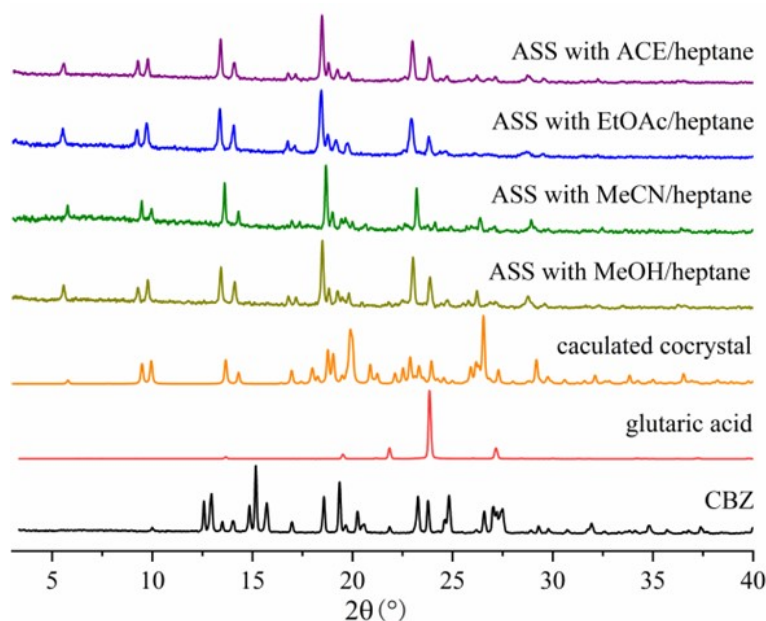

**Fig. S3** PXR D patterns of the outcome of anti-solvent slurry (ASS) experiments of CBZ/glutaric acid system.

#### Anti-solvent slurry experiment 4: CBZ-adipic acid cocrystal (2:1)

A stoichiometric mixture of CBZ (15.3 mg, 0.065 mmol) and adipic acid (4.7 mg, 0.032 mmol) was added to 1 mL heptane with addition of 10  $\mu$ L MeOH/10  $\mu$ L MeCN/10  $\mu$ L EtOAc/10  $\mu$ L ACE and left to stir for 24 hours at room temperature.

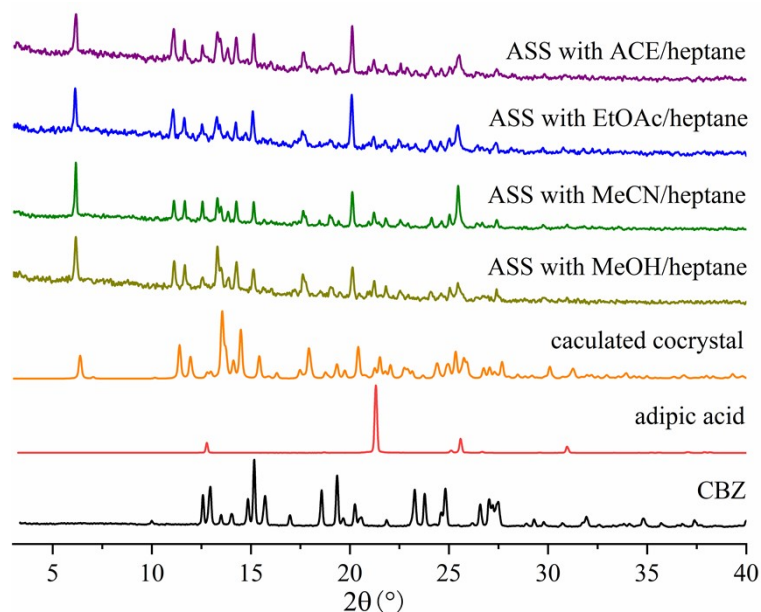

**Fig. S4** PXR D patterns of the outcome of anti-solvent slurry (ASS) experiments of CBZ/adipic acid system.

#### Anti-solvent slurry experiment 5: CBZ-L(+)-tartaric acid cocrystal (1:1)

An equimolar mixture of CBZ (12.2 mg, 0.052 mmol) and L(+)-tartaric acid (7.8 mg, 0.052 mmol) was added to 1 mL heptane with addition of 10  $\mu$ L MeOH/10  $\mu$ L MeCN/10  $\mu$ L EtOAc/10  $\mu$ L ACE and left to stir for 48 hours at room temperature.

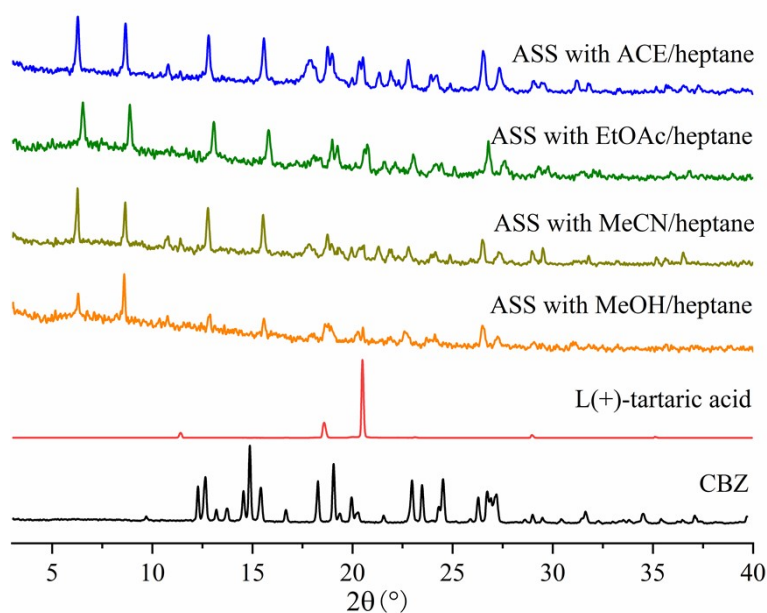

**Fig. S5** PXR D patterns of the outcome of anti-solvent slurry (ASS) experiments of CBZ/L(+)-tartaric acid system.

### Anti-solvent slurry experiment 6: CBZ-L-malic acid cocrystal (1:1)

An equimolar mixture of CBZ (12.8 mg, 0.054 mmol) and L-malic acid (7.2 mg, 0.054 mmol) was added to 1 mL heptane with addition of 10  $\mu$ L MeOH/10  $\mu$ L MeCN/10  $\mu$ L EtOAc/10  $\mu$ L ACE and left to stir for 48 hours at room temperature.

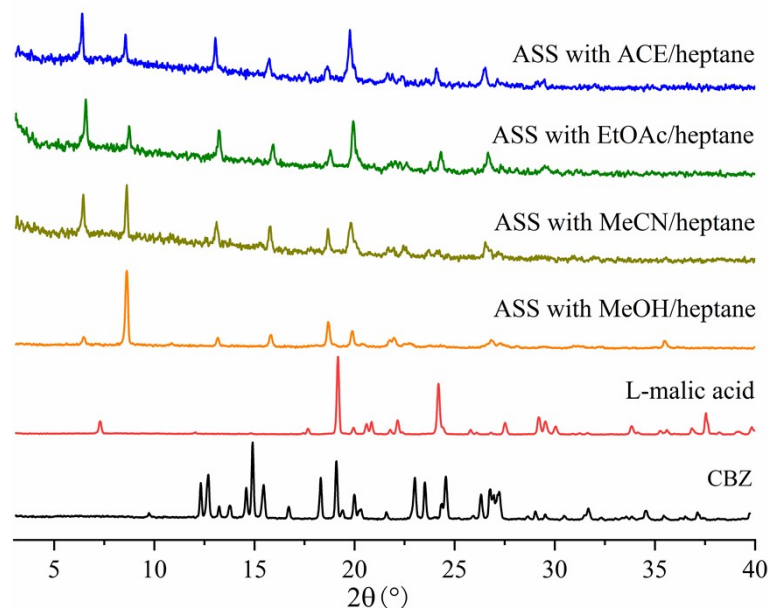

**Fig. S6** PXRD patterns of the outcome of anti-solvent slurry (ASS) experiments of CBZ/L-malic acid system.

### Anti-solvent slurry experiment 7: CBZ-DL-malic acid cocrystal (1:1)

An equimolar mixture of CBZ (12.8 mg, 0.054 mmol) and DL-malic acid (7.2 mg, 0.054 mmol) was added to 1 mL heptane with addition of 10  $\mu$ L MeOH/10  $\mu$ L MeCN/10  $\mu$ L EtOAc/10  $\mu$ L ACE and left to stir for 24 hours at room temperature.

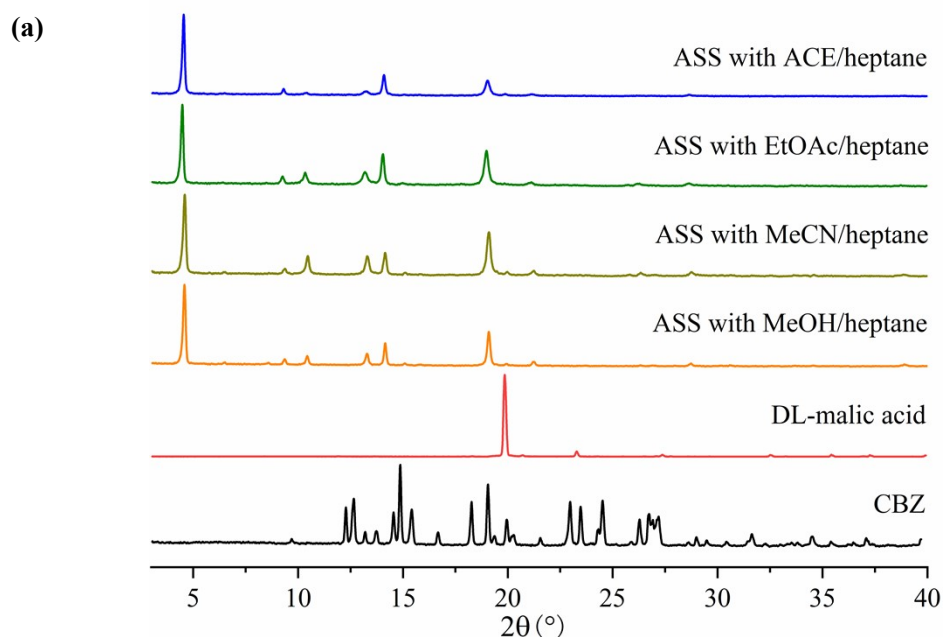

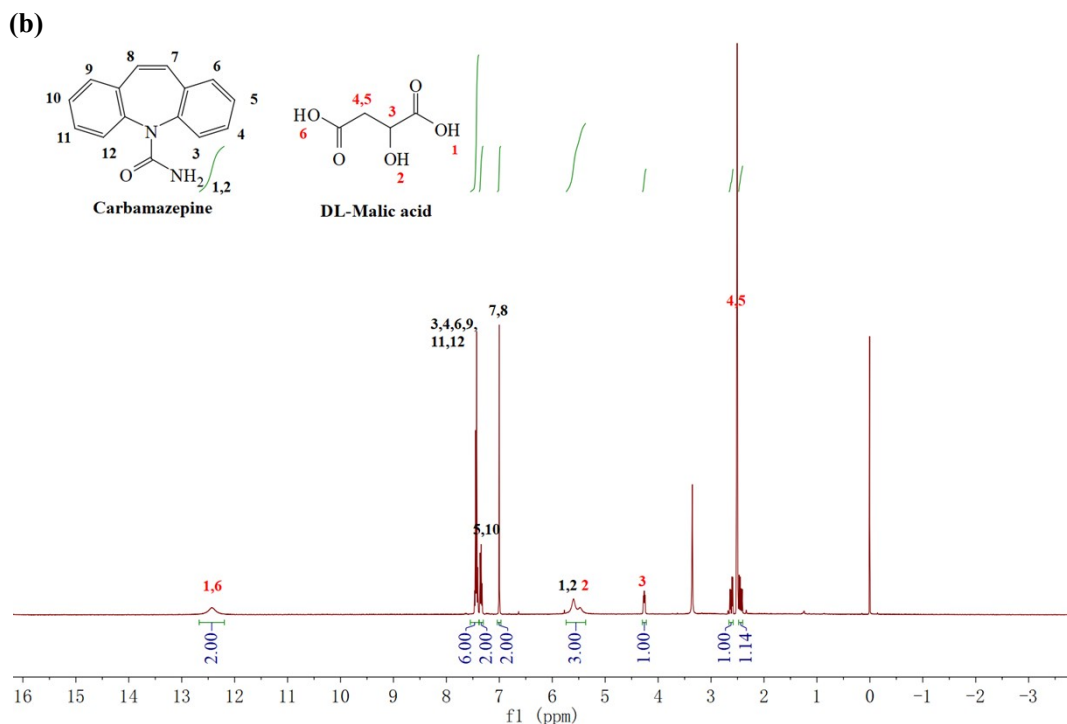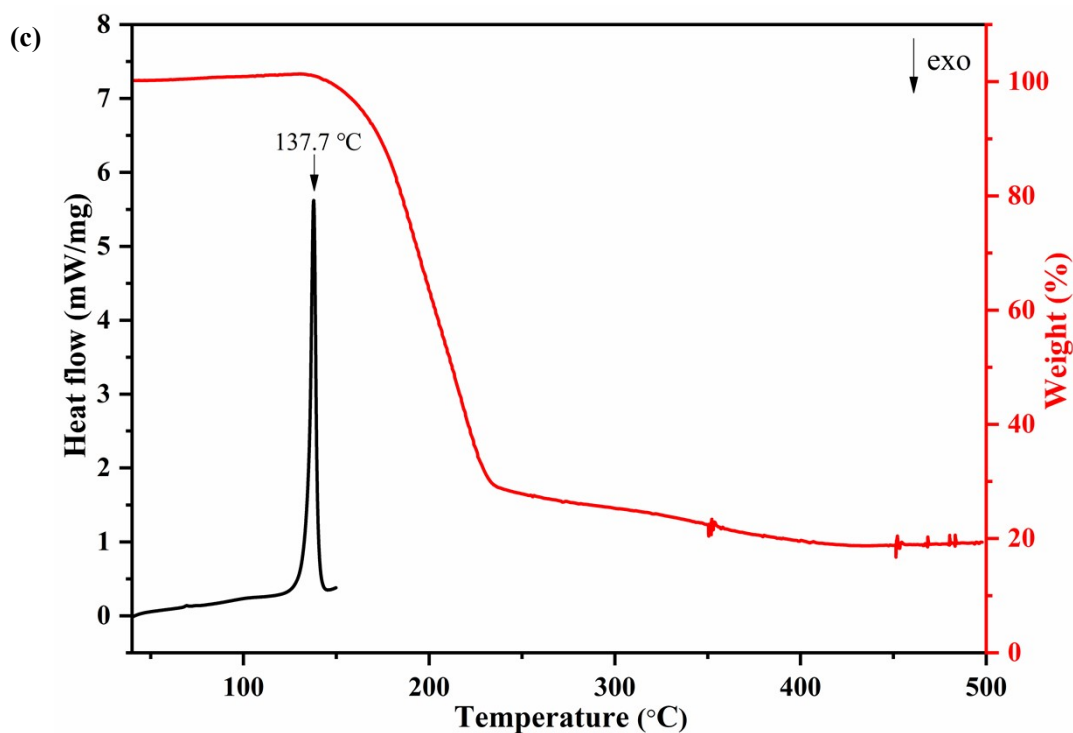

**Fig. S7** (a) PXRD patterns of the outcome of anti-solvent slurry (ASS) experiments of CBZ/DL-malic acid system. (b)  $^1\text{H}$  NMR spectrum and (c) TG-DSC curve of CBZ-DL-malic acid cocrystal.

#### Anti-solvent slurry experiment 8: CBZ-benzoic acid cocrystal (1:1)

An equimolar mixture of CBZ (13.2 mg, 0.056 mmol) and benzoic acid (6.8 mg, 0.056 mmol) was added to 1 mL heptane with addition of 10  $\mu\text{L}$  MeOH/10  $\mu\text{L}$  MeCN/10  $\mu\text{L}$  EtOAc/10  $\mu\text{L}$  ACE and left to stir for 24 hours at room temperature.

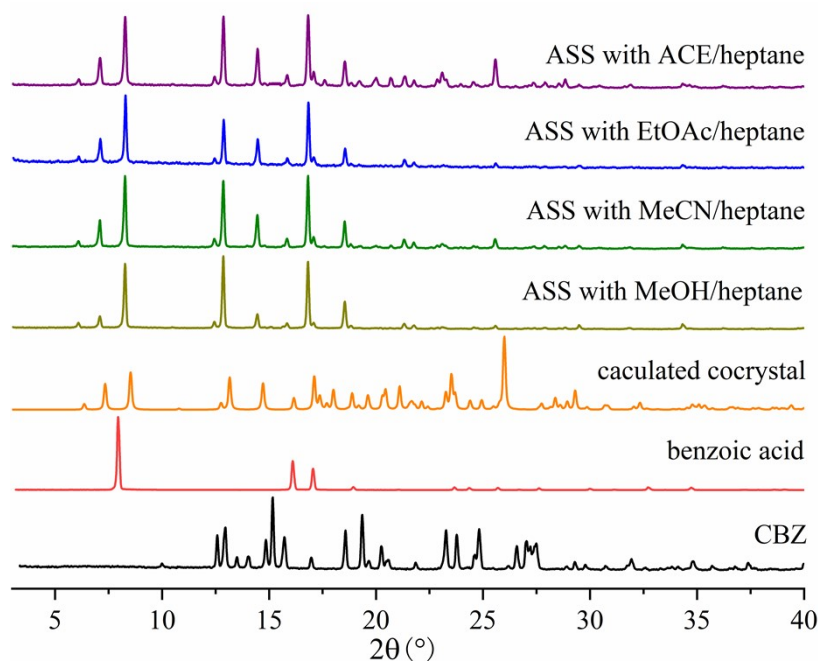

**Fig. S8** PXRD patterns of the outcome of anti-solvent slurry (ASS) experiments of CBZ/benzoic acid system.

**Anti-solvent slurry experiment 9: CBZ-cinnamic acid (1:1)**

An equimolar mixture of CBZ (12.3 mg, 0.052 mmol) and cinnamic acid (7.7 mg, 0.052 mmol) was added to 1 mL heptane with addition of 10  $\mu$ L MeOH/10  $\mu$ L MeCN/10  $\mu$ L EtOAc/10  $\mu$ L ACE and left to stir for 24 hours at room temperature.

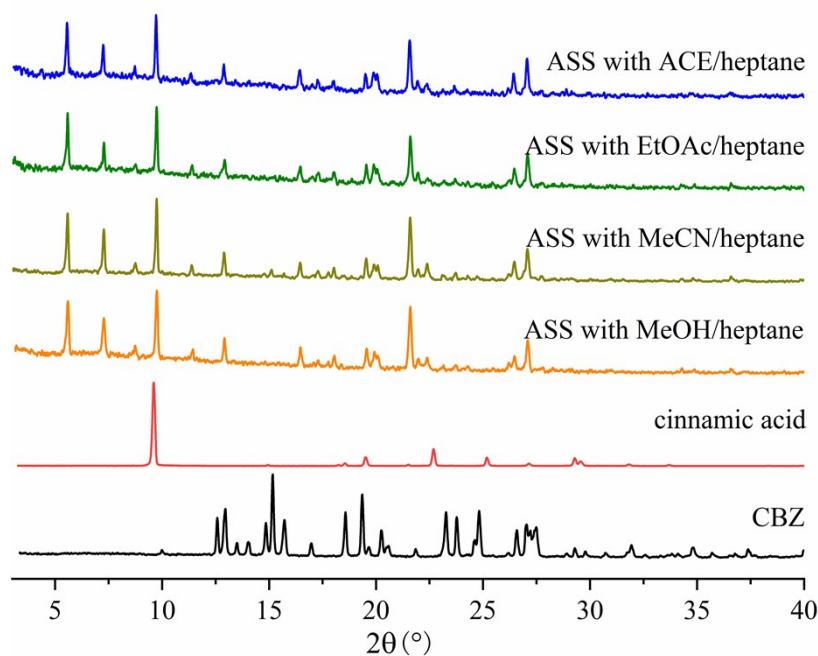

**Fig. S9** PXRD patterns of the outcome of anti-solvent slurry (ASS) experiments of CBZ/cinnamic acid system.



### Anti-solvent slurry experiment 10: CBZ-salicylic acid cocrystal (1:1)

An equimolar mixture of CBZ (12.6 mg, 0.053 mmol) and salicylic acid (7.4 mg, 0.054 mmol) was added to 1 mL heptane with addition of 10  $\mu$ L MeOH/10  $\mu$ L MeCN/10  $\mu$ L EtOAc/10  $\mu$ L ACE and left to stir for 24 hours at room temperature.

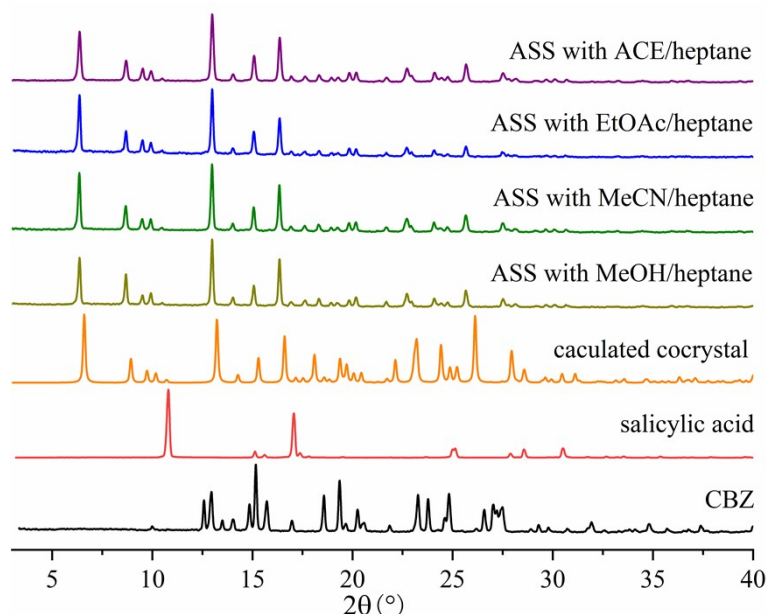

**Fig. S10** PXR D patterns of the outcome of anti-solvent slurry (ASS) experiments of CBZ/salicylic acid system.

### Anti-solvent slurry experiment 11: CBZ-acetylsalicylic acid cocrystal (1:1)

An equimolar mixture of CBZ (11.3 mg, 0.048 mmol) and acetylsalicylic acid (8.7 mg, 0.048 mmol) was added to 1 mL heptane with addition of 40  $\mu$ L MeOH/40  $\mu$ L MeCN/100  $\mu$ L EtOAc/40  $\mu$ L ACE and left to stir for 24 hours at room temperature.

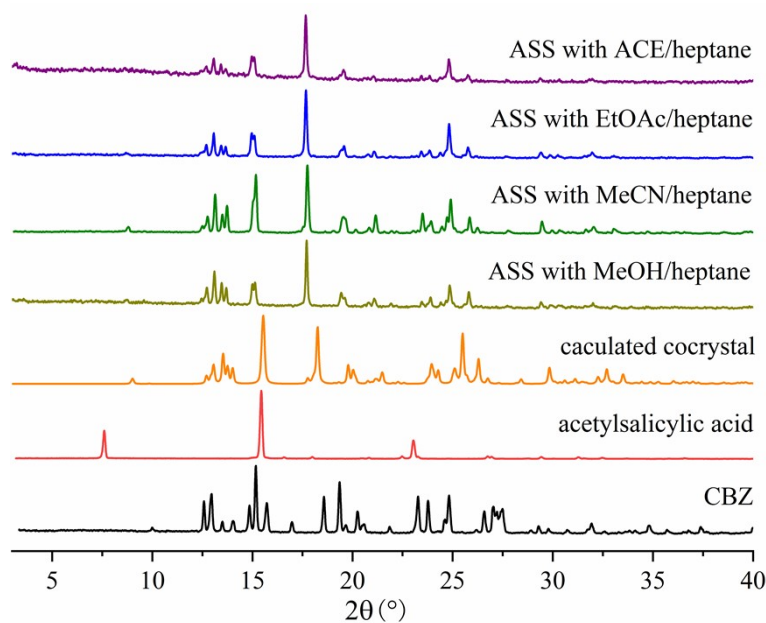

**Fig. S11** PXR D patterns of the outcome of anti-solvent slurry (ASS) experiments of CBZ/acetylsalicylic acid system.

### Anti-solvent slurry experiment 12: CBZ-1-hydroxy-2-naphthoic acid cocrystal (1:1)

An equimolar mixture of CBZ (11.1 mg, 0.047 mmol) and 1-hydroxy-2-naphthoic acid (8.9 mg, 0.047 mmol) was added to 1 mL heptane with addition of 10  $\mu$ L MeOH/10  $\mu$ L MeCN/10  $\mu$ L EtOAc/10  $\mu$ L ACE and left to stir for 24 hours at room temperature.

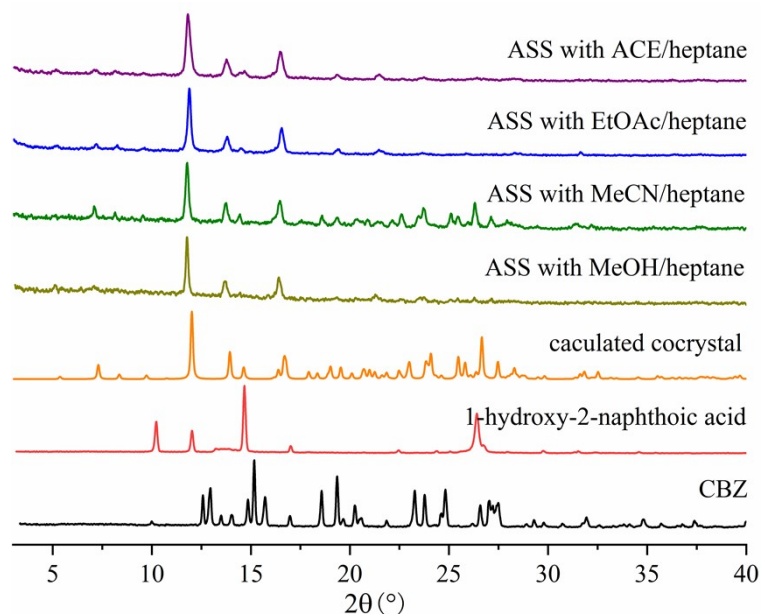

**Fig. S12** PXRD patterns of the outcome of anti-solvent slurry (ASS) experiments of CBZ/1-hydroxy-2-naphthoic acid system.

### Anti-solvent slurry experiment 13: CBZ-4-hydroxybenzoic acid cocrystal (1:1)

An equimolar mixture of CBZ (12.6 mg, 0.053 mmol) and 4-hydroxybenzoic acid (7.4 mg, 0.053 mmol) was added to 1 mL heptane with addition of 10  $\mu$ L MeOH/10  $\mu$ L MeCN/10  $\mu$ L EtOAc/10  $\mu$ L ACE and left to stir for 24 hours at room temperature.

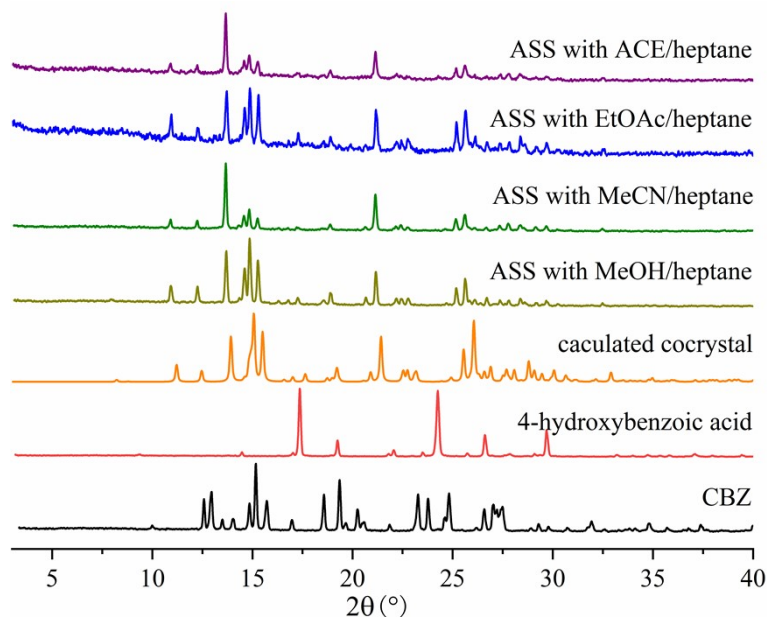

**Fig. S13** PXRD patterns of the outcome of anti-solvent slurry (ASS) experiments of CBZ/4-hydroxybenzoic acid system.

#### Anti-solvent slurry experiment 14: CBZ-vanillic acid cocrystal hydrate (1:1)

An equimolar mixture of CBZ (11.7 mg, 0.050 mmol) and vanillic acid (8.3 mg, 0.049 mmol) was added to 1 mL heptane with addition of 10  $\mu$ L MeOH/40  $\mu$ L MeCN/100  $\mu$ L EtOAc/100  $\mu$ L ACE and left to stir for 24 hours at room temperature.

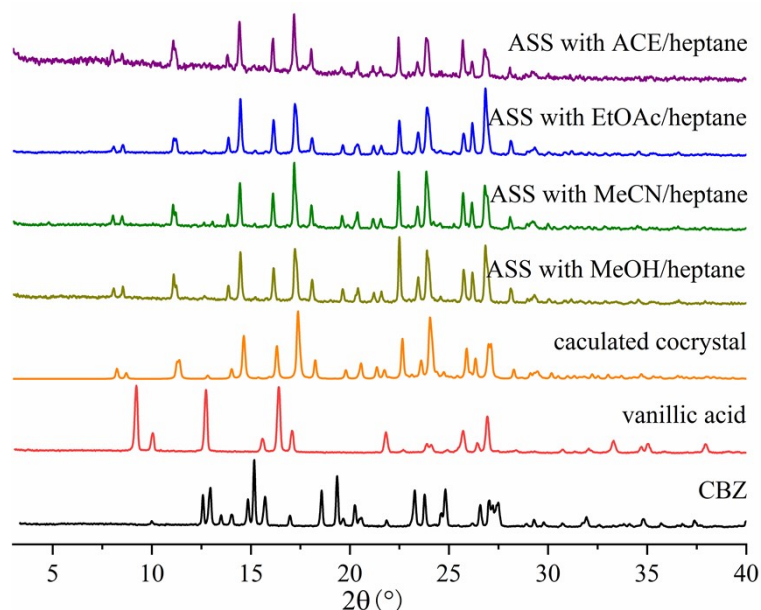

**Fig. S14** PXR D patterns of the outcome of anti-solvent slurry (ASS) experiments of CBZ/vanillic acid system.

#### Anti-solvent slurry experiment 15: CBZ-2, 4-dihydroxybenzoic acid cocrystal (1:1)

An equimolar mixture of CBZ (12.1 mg, 0.051 mmol) and 2, 4-dihydroxybenzoic acid (7.9 mg, 0.051 mmol) was added to 1 mL heptane with addition of 10  $\mu$ L MeOH/10  $\mu$ L MeCN/10  $\mu$ L EtOAc/10  $\mu$ L ACE and left to stir for 24 hours at room temperature.

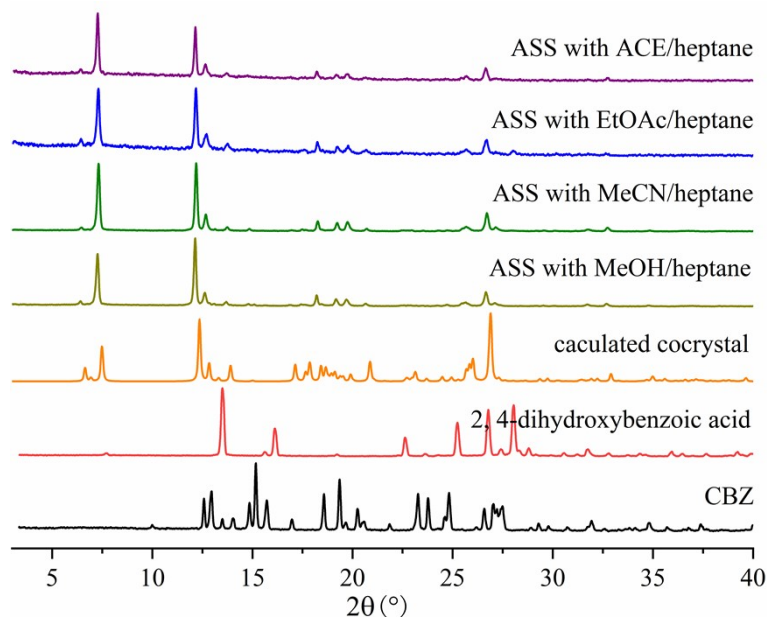

**Fig. S15** PXR D patterns of the outcome of anti-solvent slurry (ASS) experiments of CBZ/2, 4-

dihydroxybenzoic acid system.

### Anti-solvent slurry experiment 16: CBZ-2, 5-dihydroxybenzoic acid cocrystal (1:1)

An equimolar mixture of CBZ (12.1 mg, 0.051 mmol) and 2, 5-dihydroxybenzoic acid (7.9 mg, 0.051 mmol) was added to 1 mL heptane with addition of 10  $\mu$ L MeOH/10  $\mu$ L MeCN/10  $\mu$ L EtOAc/10  $\mu$ L ACE and left to stir for 24 hours at room temperature.

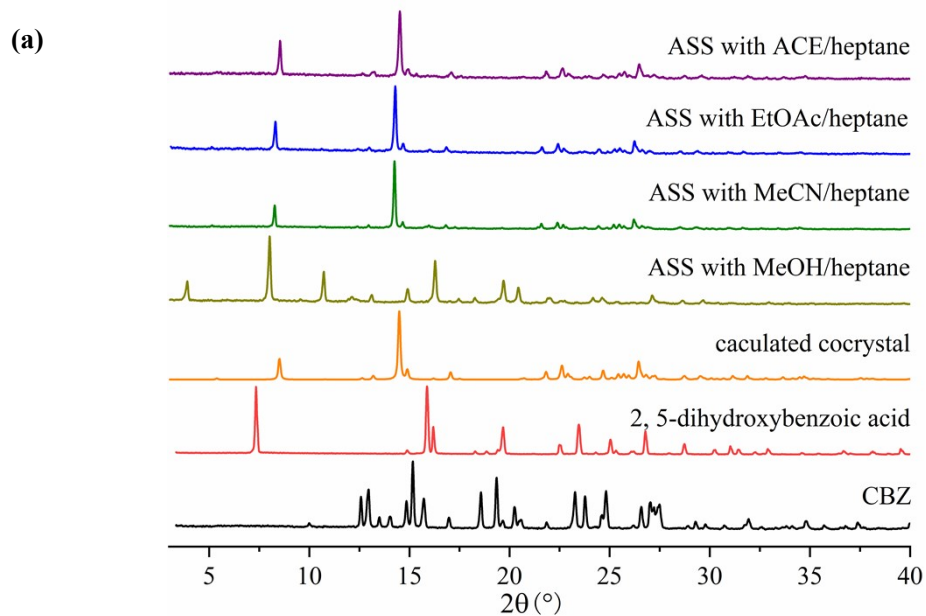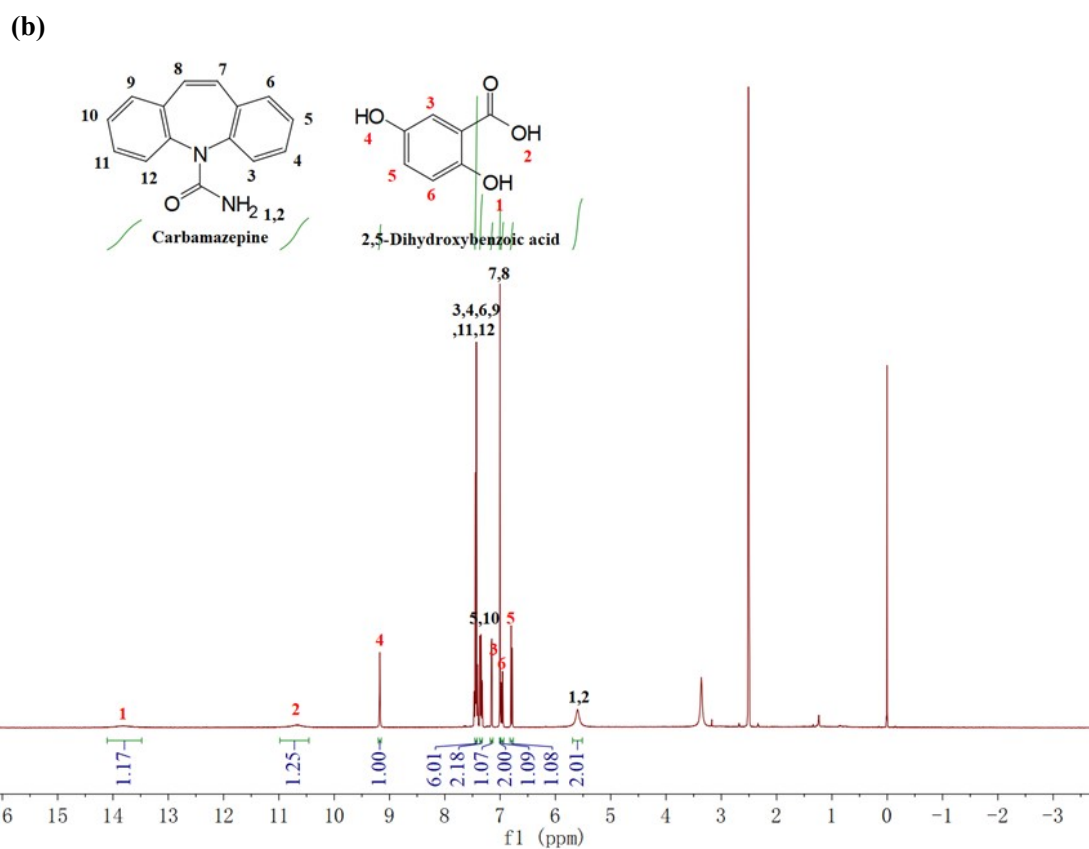

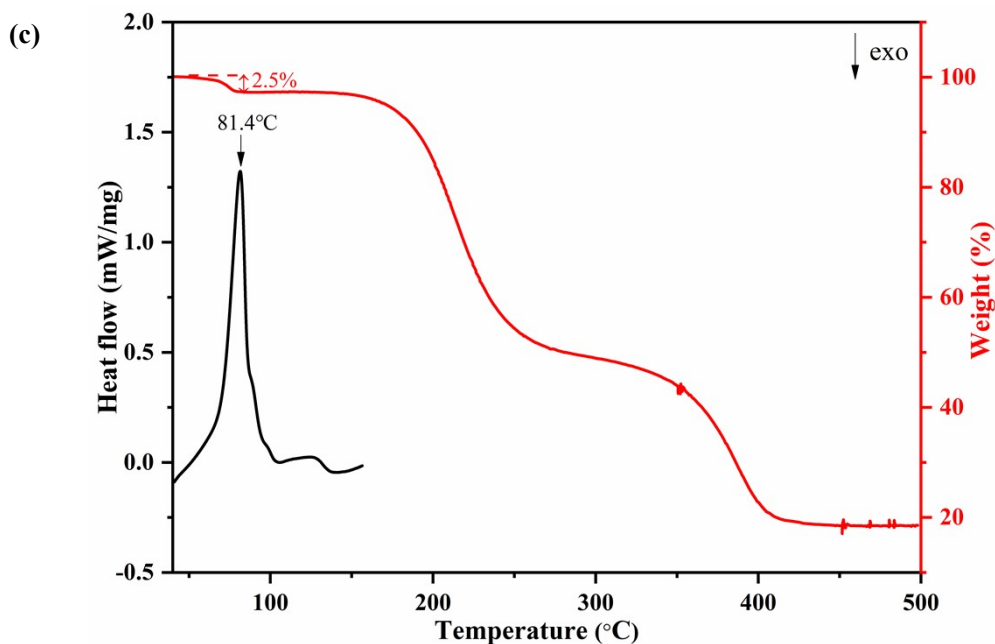

**Fig. S16** (a) PXRD patterns of the outcome of anti-solvent slurry (ASS) experiments of CBZ/2, 5-dihydroxybenzoic acid system. (b)  $^1\text{H}$  NMR spectrum and (c) TG-DSC curve of the newly obtained hemihydrate of CBZ-2, 5-dihydroxybenzoic acid cocrystal during ASS with MeOH.

#### Anti-solvent slurry experiment 17: CBZ-2, 6-dihydroxybenzoic acid cocrystal (1:1)

An equimolar mixture of CBZ (12.1 mg, 0.051 mmol) and 2, 6-dihydroxybenzoic acid (7.9 mg, 0.051 mmol) was added to 1 mL heptane with addition of 10  $\mu\text{L}$  MeOH/10  $\mu\text{L}$  MeCN/10  $\mu\text{L}$  EtOAc/10  $\mu\text{L}$  ACE and left to stir for 24 hours at room temperature.

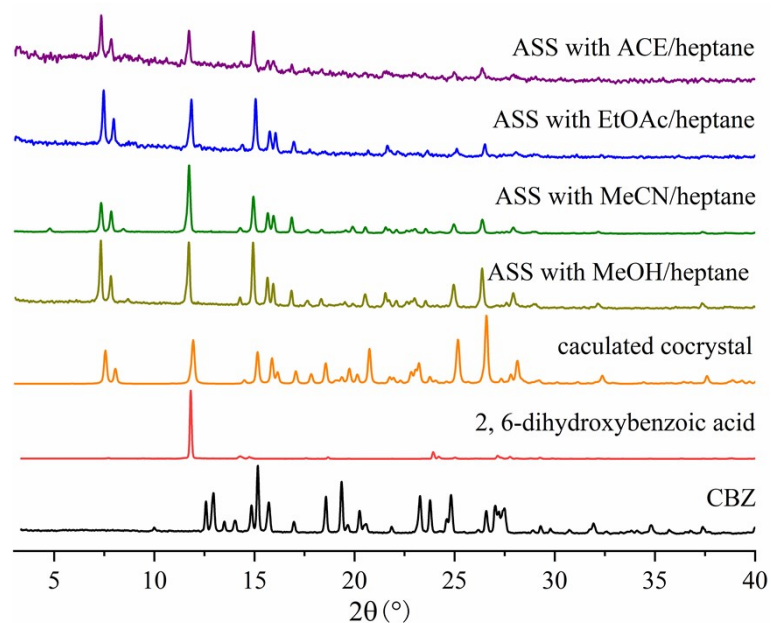

**Fig. S17** PXRD patterns of the outcome of anti-solvent slurry (ASS) experiments of CBZ/2, 6-dihydroxybenzoic acid system.

### Anti-solvent slurry experiment 18: CBZ-2, 6-pyridinedicarboxylic acid cocrystal (1:1)

An equimolar mixture of CBZ (11.7 mg, 0.050 mmol) and 2, 6-pyridinedicarboxylic acid (8.3 mg, 0.050 mmol) was added to 1 mL heptane with addition of 20  $\mu$ L MeOH/40  $\mu$ L MeCN/40  $\mu$ L EtOAc/10  $\mu$ L ACE and left to stir for 48 hours at room temperature.

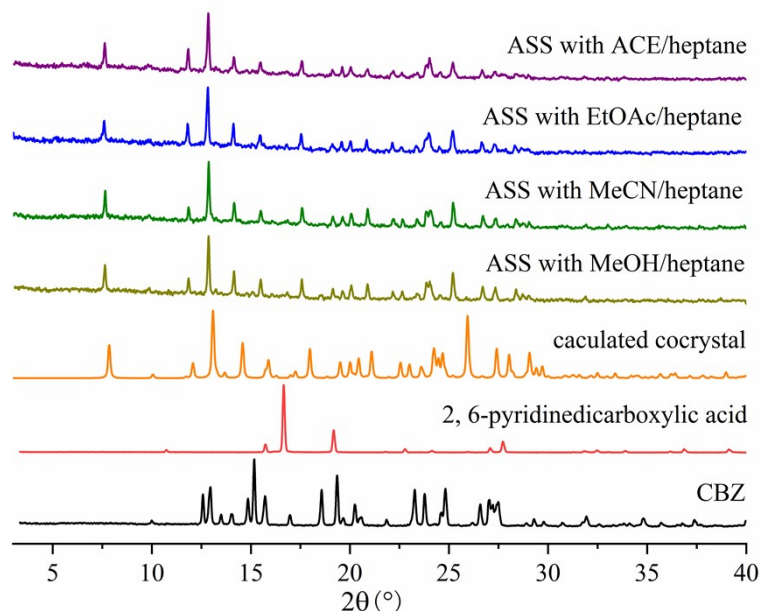

**Fig. S18** PXR D patterns of the outcome of anti-solvent slurry (ASS) experiments of CBZ/2, 6-pyridinedicarboxylic acid system.

### Anti-solvent slurry experiment 19: CBZ-benzamide cocrystal (1:1)

An equimolar mixture of CBZ (13.2 mg, 0.056 mmol) and benzamide (6.8 mg, 0.056 mmol) was added to 1 mL heptane with addition of 10  $\mu$ L MeOH/10  $\mu$ L MeCN/10  $\mu$ L EtOAc/10  $\mu$ L ACE and left to stir for 24 hours at room temperature.

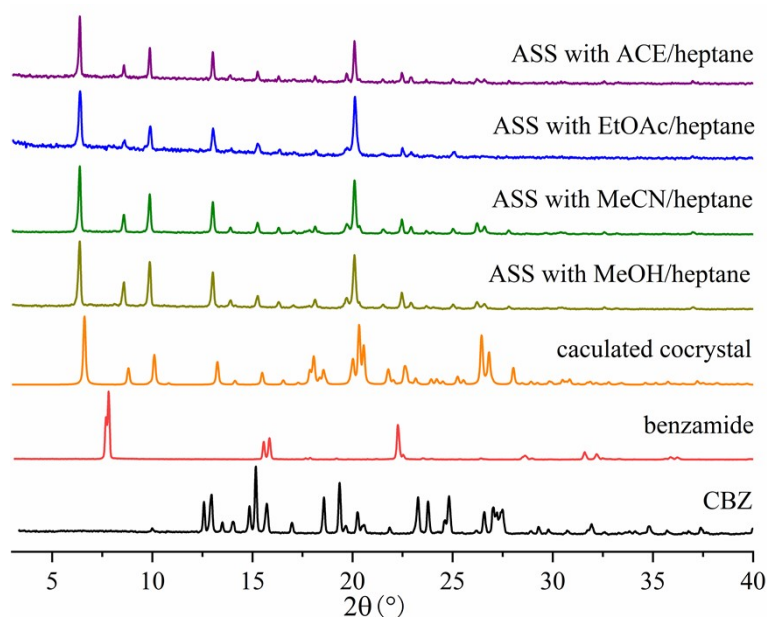

**Fig. S19** PXR D patterns of the outcome of anti-solvent slurry (ASS) experiments of

CBZ/benzamide system.

**Anti-solvent slurry experiment 20: CBZ-isonicotinamide cocrystal (1:1)**

An equimolar mixture of CBZ (13.2 mg, 0.056 mmol) and isonicotinamide (6.8 mg, 0.056 mmol) was added to 1 mL heptane with addition of 10  $\mu$ L MeOH/10  $\mu$ L MeCN/10  $\mu$ L EtOAc/10  $\mu$ L ACE and left to stir for 24 hours at room temperature.

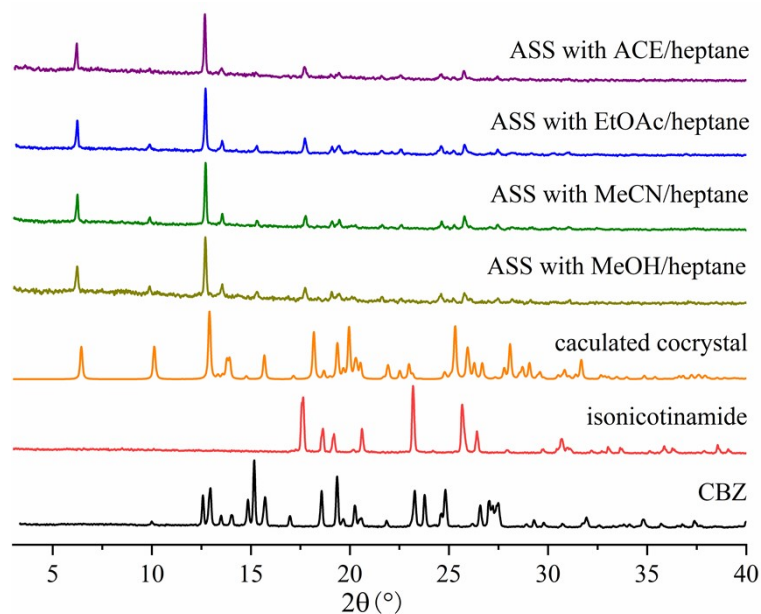

**Fig. S20** PXR D patterns of the outcome of anti-solvent slurry (ASS) experiments of CBZ/isonicotinamide system.

**Anti-solvent slurry experiment 21: CBZ-nicotinamide cocrystal (1:1)**

An equimolar mixture of CBZ (13.2 mg, 0.056 mmol) and nicotinamide (6.8 mg, 0.056 mmol) was added to 1 mL heptane with addition of 10  $\mu$ L MeOH/10  $\mu$ L MeCN/10  $\mu$ L EtOAc/10  $\mu$ L ACE and left to stir for 24 hours at room temperature.

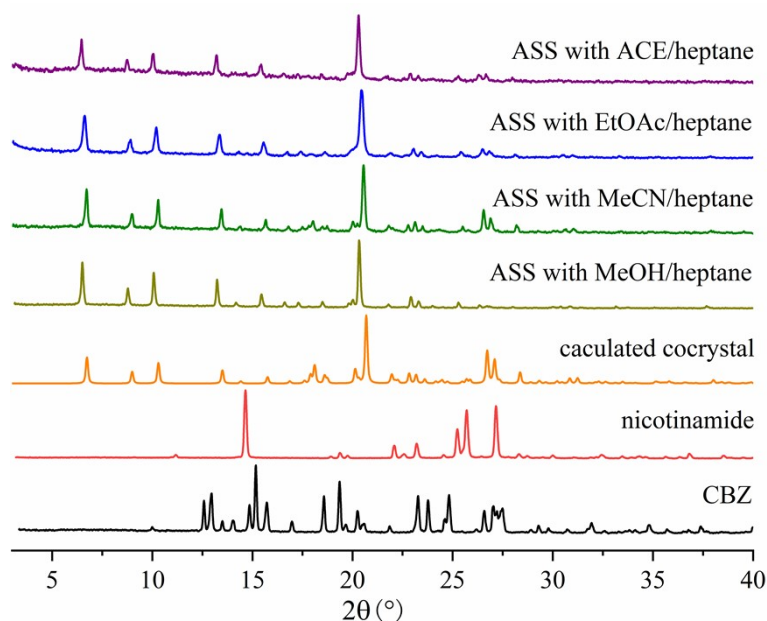

**Fig. S21** PXR D patterns of the outcome of anti-solvent slurry (ASS) experiments of CBZ/

nicotinamide system.

**Anti-solvent slurry experiment 22: CBZ-4-hydroxybenzamide cocrystal (1:1)**

An equimolar mixture of CBZ (12.7 mg, 0.054 mmol) and 4-hydroxybenzamide (7.4 mg, 0.054 mmol) was added to 1 mL heptane with addition of 10  $\mu$ L MeOH/10  $\mu$ L MeCN/10  $\mu$ L EtOAc/10  $\mu$ L ACE and left to stir for 24 hours at room temperature.

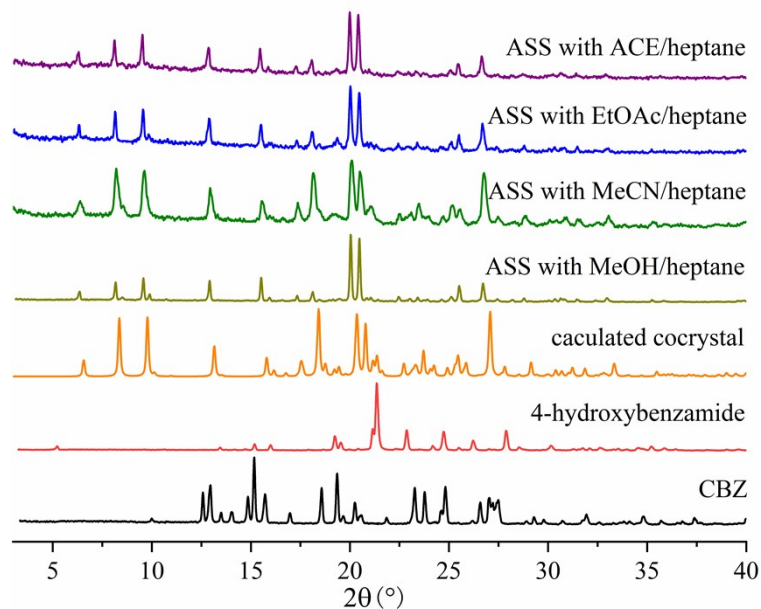

**Fig. S22** PXR D patterns of the outcome of anti-solvent slurry (ASS) experiments of CBZ/4-hydroxybenzamide system.

**Anti-solvent slurry experiment 23: CBZ-saccharin (1:1)**

An equimolar mixture of CBZ (11.3 mg, 0.048 mmol) and saccharin (8.7 mg, 0.048 mmol) was added to 1 mL heptane with addition of 10  $\mu$ L MeOH/10  $\mu$ L MeCN/10  $\mu$ L EtOAc/10  $\mu$ L ACE and left to stir for 24 hours at room temperature.

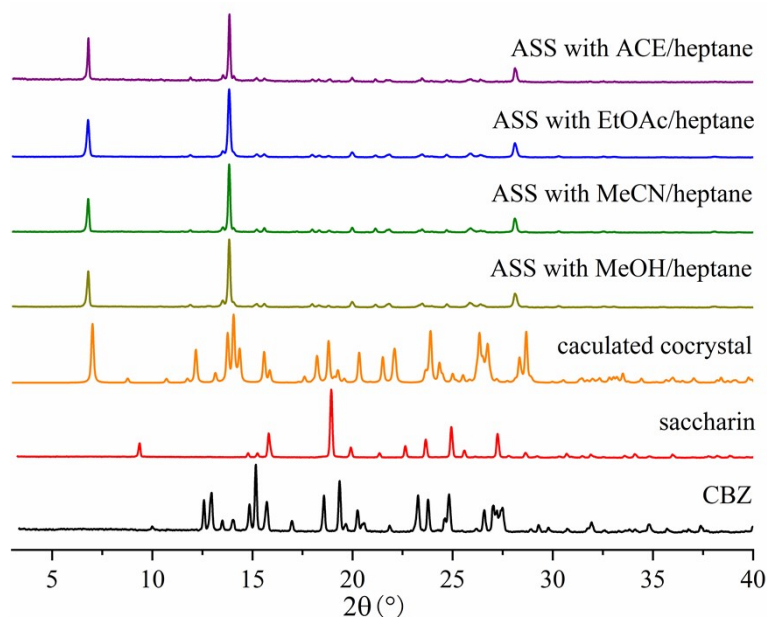

**Fig. S23** PXR D patterns of the outcome of anti-solvent slurry (ASS) experiments of CBZ/saccharin system.



### Anti-solvent slurry experiment 24: CBZ-4, 4'-bipyridine cocrystal (2:1)

A stoichiometric mixture of CBZ (15.0 mg, 0.063 mmol) and 4, 4'-bipyridine (5.0 mg, 0.032 mmol) was added to 1 mL heptane with addition of 10  $\mu$ L MeOH/10  $\mu$ L MeCN/10  $\mu$ L EtOAc/10  $\mu$ L ACE and left to stir for 24 hours at room temperature.

### Slurry experiment: CBZ-4, 4'-bipyridine cocrystal (2:1)

A stoichiometric mixture of CBZ (636.0 mg, 2.69 mmol) and 4, 4'-bipyridine (210.2 mg, 1.35 mmol) was added to 1 mL ACE and left to stir for 24 hours at room temperature.

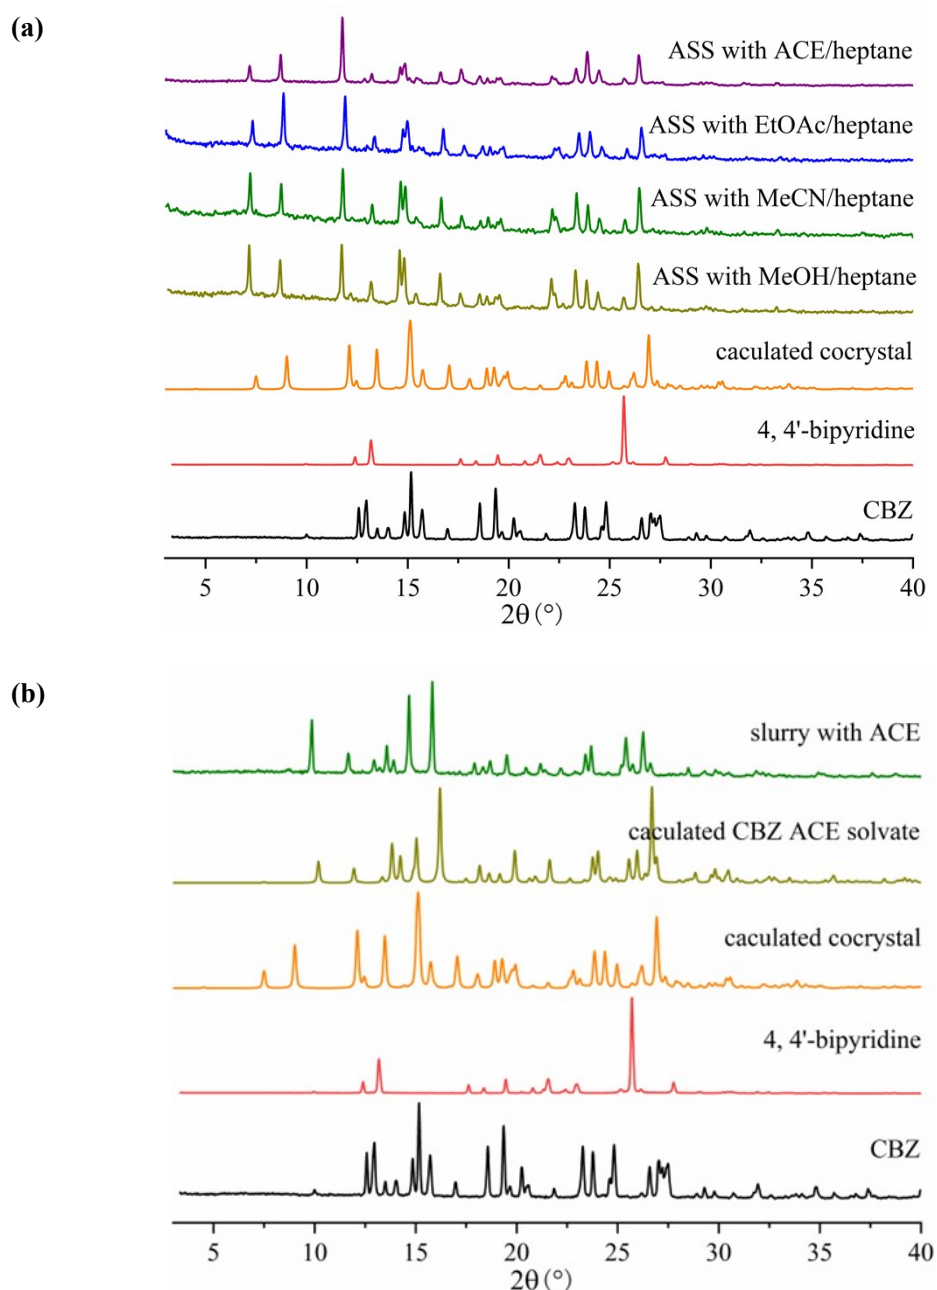

Fig. S24 PXR D patterns of the outcome of (a) anti-solvent slurry (ASS) experiments and (b) slurry

experiments of CBZ/4, 4'-bipyridine system.

**Anti-solvent slurry experiment 25: CBZ-naringenin cocrystal (1:1)**

An equimolar mixture of CBZ (9.3 mg, 0.039 mmol) and naringenin (10.7 mg, 0.039 mmol) was added to 1 mL heptane with addition of 10  $\mu$ L MeOH/40  $\mu$ L MeCN/100  $\mu$ L EtOAc/100  $\mu$ L ACE and left to stir for 48 hours at room temperature.

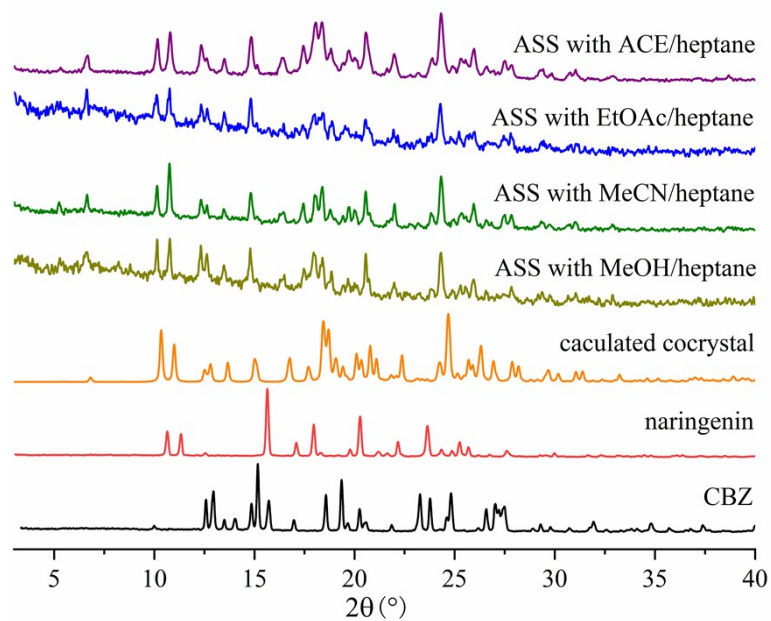

**Fig. S25** PXR D patterns of the outcome of anti-solvent slurry (ASS) experiments of CBZ/naringenin system.
